# Supplementary material for: Comparison of Flunixin Meglumine, Meloxicam and Ketoprofen on Mild Visceral Post-Operative Pain in Horses
Source: MDPI journal article supplement (doi:10.3390/ani12040526), 2022-02-21
Supplement: s1 [file s1]

Table S1: Individual data Study 1 - Variability of pain score based on evaluator's experience

| Case | Evaluator | NSAID | Time drug - score (hours) | Pain score assessment |    |    |    |    |    |    |    |    |         |    |    |             |    |    |          |    |    |       |    |    |                    |    |    | Pain score /31 |    |    |    |    |     |    |     |  |  |  |  |  |  |  |  |  |  |  |  |  |  |  |  |  |  |  |  |  |  |  |  |  |  |  |  |  |  |  |  |  |  |  |  |  |  |  |  |  |  |  |  |  |  |  |  |  |  |  |  |  |  |  |  |  |  |  |  |  |  |  |  |  |  |  |  |  |  |  |  |  |  |  |  |  |  |  |  |  |  |  |  |  |  |  |  |  |  |  |  |  |  |  |  |  |  |  |  |  |  |  |  |  |  |  |  |  |  |  |  |  |  |  |  |  |  |  |  |  |  |  |  |  |  |  |  |  |  |  |  |  |  |  |  |  |  |  |  |  |  |  |  |  |  |  |  |  |  |  |  |  |  |  |  |  |  |  |  |  |  |  |  |  |  |  |  |  |  |  |  |  |  |  |  |  |  |  |  |  |  |  |  |  |  |  |  |  |  |  |  |  |  |  |  |  |  |  |  |  |  |  |  |  |  |  |  |  |  |  |  |  |  |  |  |  |  |  |  |  |  |  |  |  |  |  |  |  |  |  |  |  |  |  |  |  |  |  |  |  |  |  |  |  |  |  |  |  |  |  |  |  |  |  |  |  |  |  |  |  |  |  |  |  |  |  |  |  |  |  |  |  |  |  |  |  |  |  |  |  |  |  |  |  |  |  |  |  |  |  |  |  |  |  |  |  |  |  |  |  |  |  |  |  |  |  |  |  |  |  |  |  |  |  |  |  |  |  |  |  |  |  |  |  |  |  |  |  |  |  |  |  |  |  |  |  |  |  |  |  |  |  |  |  |  |  |  |  |  |  |  |  |  |  |  |  |  |  |  |  |  |  |  |  |  |  |  |  |  |  |  |  |  |  |  |  |  |  |  |  |  |  |  |  |  |  |  |  |  |  |  |  |  |  |  |  |  |  |  |  |  |  |  |  |  |  |  |  |  |  |  |  |  |  |  |  |  |  |  |  |  |  |  |  |  |  |  |  |  |  |  |  |  |  |  |  |  |  |  |  |  |  |  |  |  |  |  |  |  |  |  |  |  |  |  |  |  |  |  |  |  |  |  |  |  |  |  |  |  |  |  |  |  |  |  |  |  |  |  |  |  |  |  |  |  |  |  |  |  |  |  |  |  |  |  |  |  |  |  |  |  |  |  |  |  |  |  |  |  |  |  |  |  |  |  |  |  |  |  |  |  |  |  |  |  |  |  |  |  |  |  |  |  |  |  |  |  |  |  |  |  |  |  |  |  |  |  |  |  |  |  |  |  |  |  |  |  |  |  |  |  |  |  |  |  |  |  |  |  |  |  |  |  |  |  |  |  |  |  |  |  |  |  |  |  |  |  |  |  |  |  |  |  |  |  |  |  |  |  |  |  |  |  |  |  |  |  |  |  |  |  |  |  |  |  |  |  |  |  |  |  |  |  |  |  |  |  |  |  |  |  |  |  |  |  |  |  |  |  |  |  |  |  |  |  |  |  |  |  |  |  |  |  |  |  |  |  |  |  |  |  |  |  |  |  |  |  |  |  |  |  |  |  |  |  |  |  |  |  |  |  |  |  |  |  |  |  |  |  |  |  |  |  |  |  |  |  |  |  |  |  |  |  |  |  |  |  |  |  |  |  |  |  |  |  |  |  |  |  |  |  |  |  |  |  |  |  |  |  |  |  |  |  |  |  |  |  |  |  |  |  |  |  |  |  |  |  |  |  |  |  |  |  |  |  |  |  |  |  |  |  |  |  |  |  |  |  |  |  |  |  |  |  |  |  |  |  |  |  |  |  |  |  |  |  |  |  |  |  |  |  |  |  |  |  |  |  |  |  |  |  |  |  |  |  |  |  |  |  |  |  |  |  |  |  |  |  |  |  |  |  |  |  |  |  |  |  |  |  |  |  |  |  |  |  |  |  |  |  |  |  |  |  |  |  |  |  |  |  |  |  |  |  |  |  |  |  |  |  |  |  |  |  |  |  |  |  |  |  |  |  |  |  |  |  |  |  |  |  |  |  |  |  |  |  |  |  |  |  |  |  |  |  |  |  |  |  |  |  |  |  |  |  |  |  |  |  |  |  |  |  |  |  |  |  |  |  |  |  |  |  |  |  |  |  |  |  |  |  |  |  |  |  |  |  |  |  |  |  |  |  |  |  |  |  |  |  |  |  |  |  |  |  |  |  |  |  |  |  |  |  |  |  |  |  |  |  |  |  |  |  |  |  |  |  |  |  |  |  |  |  |  |  |  |  |  |  |  |  |  |  |  |  |  |  |  |  |  |  |  |  |  |  |  |  |  |  |  |  |  |  |  |  |  |  |  |  |  |  |  |  |  |  |  |  |  |  |  |  |  |  |  |  |  |  |  |  |  |  |  |  |  |  |  |  |  |  |  |  |  |  |  |  |  |  |  |  |  |  |  |  |  |  |  |  |  |  |  |  |  |  |  |  |  |  |  |  |  |  |  |  |  |  |  |  |  |  |  |  |  |  |  |  |  |  |  |  |  |  |  |  |  |  |  |  |  |  |  |  |  |  |  |  |  |  |  |  |  |  |  |  |  |  |  |  |  |  |  |  |  |  |  |  |  |  |  |  |  |  |  |  |  |  |  |  |  |  |  |  |  |  |  |  |  |  |  |  |  |  |  |  |  |  |  |  |  |  |  |  |  |  |  |  |  |  |  |  |  |  |  |  |  |  |  |  |  |  |  |  |  |  |  |  |  |  |  |  |  |  |  |  |  |  |  |  |  |  |  |  |  |  |  |  |  |  |  |  |  |  |  |  |  |  |  |  |  |  |
|------|-----------|-------|---------------------------|-----------------------|----|----|----|----|----|----|----|----|---------|----|----|-------------|----|----|----------|----|----|-------|----|----|--------------------|----|----|----------------|----|----|----|----|-----|----|-----|--|--|--|--|--|--|--|--|--|--|--|--|--|--|--|--|--|--|--|--|--|--|--|--|--|--|--|--|--|--|--|--|--|--|--|--|--|--|--|--|--|--|--|--|--|--|--|--|--|--|--|--|--|--|--|--|--|--|--|--|--|--|--|--|--|--|--|--|--|--|--|--|--|--|--|--|--|--|--|--|--|--|--|--|--|--|--|--|--|--|--|--|--|--|--|--|--|--|--|--|--|--|--|--|--|--|--|--|--|--|--|--|--|--|--|--|--|--|--|--|--|--|--|--|--|--|--|--|--|--|--|--|--|--|--|--|--|--|--|--|--|--|--|--|--|--|--|--|--|--|--|--|--|--|--|--|--|--|--|--|--|--|--|--|--|--|--|--|--|--|--|--|--|--|--|--|--|--|--|--|--|--|--|--|--|--|--|--|--|--|--|--|--|--|--|--|--|--|--|--|--|--|--|--|--|--|--|--|--|--|--|--|--|--|--|--|--|--|--|--|--|--|--|--|--|--|--|--|--|--|--|--|--|--|--|--|--|--|--|--|--|--|--|--|--|--|--|--|--|--|--|--|--|--|--|--|--|--|--|--|--|--|--|--|--|--|--|--|--|--|--|--|--|--|--|--|--|--|--|--|--|--|--|--|--|--|--|--|--|--|--|--|--|--|--|--|--|--|--|--|--|--|--|--|--|--|--|--|--|--|--|--|--|--|--|--|--|--|--|--|--|--|--|--|--|--|--|--|--|--|--|--|--|--|--|--|--|--|--|--|--|--|--|--|--|--|--|--|--|--|--|--|--|--|--|--|--|--|--|--|--|--|--|--|--|--|--|--|--|--|--|--|--|--|--|--|--|--|--|--|--|--|--|--|--|--|--|--|--|--|--|--|--|--|--|--|--|--|--|--|--|--|--|--|--|--|--|--|--|--|--|--|--|--|--|--|--|--|--|--|--|--|--|--|--|--|--|--|--|--|--|--|--|--|--|--|--|--|--|--|--|--|--|--|--|--|--|--|--|--|--|--|--|--|--|--|--|--|--|--|--|--|--|--|--|--|--|--|--|--|--|--|--|--|--|--|--|--|--|--|--|--|--|--|--|--|--|--|--|--|--|--|--|--|--|--|--|--|--|--|--|--|--|--|--|--|--|--|--|--|--|--|--|--|--|--|--|--|--|--|--|--|--|--|--|--|--|--|--|--|--|--|--|--|--|--|--|--|--|--|--|--|--|--|--|--|--|--|--|--|--|--|--|--|--|--|--|--|--|--|--|--|--|--|--|--|--|--|--|--|--|--|--|--|--|--|--|--|--|--|--|--|--|--|--|--|--|--|--|--|--|--|--|--|--|--|--|--|--|--|--|--|--|--|--|--|--|--|--|--|--|--|--|--|--|--|--|--|--|--|--|--|--|--|--|--|--|--|--|--|--|--|--|--|--|--|--|--|--|--|--|--|--|--|--|--|--|--|--|--|--|--|--|--|--|--|--|--|--|--|--|--|--|--|--|--|--|--|--|--|--|--|--|--|--|--|--|--|--|--|--|--|--|--|--|--|--|--|--|--|--|--|--|--|--|--|--|--|--|--|--|--|--|--|--|--|--|--|--|--|--|--|--|--|--|--|--|--|--|--|--|--|--|--|--|--|--|--|--|--|--|--|--|--|--|--|--|--|--|--|--|--|--|--|--|--|--|--|--|--|--|--|--|--|--|--|--|--|--|--|--|--|--|--|--|--|--|--|--|--|--|--|--|--|--|--|--|--|--|--|--|--|--|--|--|--|--|--|--|--|--|--|--|--|--|--|--|--|--|--|--|--|--|--|--|--|--|--|--|--|--|--|--|--|--|--|--|--|--|--|--|--|--|--|--|--|--|--|--|--|--|--|--|--|--|--|--|--|--|--|--|--|--|--|--|--|--|--|--|--|--|--|--|--|--|--|--|--|--|--|--|--|--|--|--|--|--|--|--|--|--|--|--|--|--|--|--|--|--|--|--|--|--|--|--|--|--|--|--|--|--|--|--|--|--|--|--|--|--|--|--|--|--|--|--|--|--|--|--|--|--|--|--|--|--|--|--|--|--|--|--|--|--|--|--|--|--|--|--|--|--|--|--|--|--|--|--|--|--|--|--|--|--|--|--|--|--|--|--|--|--|--|--|--|--|--|--|--|--|--|--|--|--|--|--|--|--|--|--|--|--|--|--|--|--|--|--|--|--|--|--|--|--|--|--|--|--|--|--|--|--|--|--|--|--|--|--|--|--|--|--|--|--|--|--|--|--|--|--|--|--|--|--|--|--|--|--|--|--|--|--|--|--|--|--|--|--|--|--|--|--|--|--|--|--|--|--|--|--|--|--|--|--|--|--|--|--|--|--|--|--|--|--|--|--|--|--|--|--|--|--|--|--|--|--|--|--|--|--|--|--|--|--|--|--|--|--|--|--|--|--|--|--|--|--|--|--|--|--|--|--|--|--|--|--|--|--|--|--|--|--|--|--|--|--|--|--|--|--|--|--|--|--|--|--|--|--|--|--|--|--|--|--|--|--|--|--|--|--|--|--|--|--|--|--|--|--|--|--|--|--|--|--|--|--|--|--|--|--|--|--|--|--|--|--|--|--|--|--|--|--|--|--|--|--|--|--|--|--|--|--|--|--|--|--|--|--|--|--|--|--|--|--|--|--|--|--|--|--|--|--|--|--|--|--|--|--|--|--|--|--|--|--|--|--|--|--|--|--|--|--|--|--|--|--|--|--|--|--|--|--|--|--|--|--|--|--|--|
|      |           |       |                           | Subjective assessment |    |    | HR |    |    | RR |    |    | Posture |    |    | Interaction |    |    | Appetite |    |    | Colic |    |    | Muscle stimulation |    |    | Wound          |    |    | T0 | T1 | ΔT1 | T2 | ΔT2 |  |  |  |  |  |  |  |  |  |  |  |  |  |  |  |  |  |  |  |  |  |  |  |  |  |  |  |  |  |  |  |  |  |  |  |  |  |  |  |  |  |  |  |  |  |  |  |  |  |  |  |  |  |  |  |  |  |  |  |  |  |  |  |  |  |  |  |  |  |  |  |  |  |  |  |  |  |  |  |  |  |  |  |  |  |  |  |  |  |  |  |  |  |  |  |  |  |  |  |  |  |  |  |  |  |  |  |  |  |  |  |  |  |  |  |  |  |  |  |  |  |  |  |  |  |  |  |  |  |  |  |  |  |  |  |  |  |  |  |  |  |  |  |  |  |  |  |  |  |  |  |  |  |  |  |  |  |  |  |  |  |  |  |  |  |  |  |  |  |  |  |  |  |  |  |  |  |  |  |  |  |  |  |  |  |  |  |  |  |  |  |  |  |  |  |  |  |  |  |  |  |  |  |  |  |  |  |  |  |  |  |  |  |  |  |  |  |  |  |  |  |  |  |  |  |  |  |  |  |  |  |  |  |  |  |  |  |  |  |  |  |  |  |  |  |  |  |  |  |  |  |  |  |  |  |  |  |  |  |  |  |  |  |  |  |  |  |  |  |  |  |  |  |  |  |  |  |  |  |  |  |  |  |  |  |  |  |  |  |  |  |  |  |  |  |  |  |  |  |  |  |  |  |  |  |  |  |  |  |  |  |  |  |  |  |  |  |  |  |  |  |  |  |  |  |  |  |  |  |  |  |  |  |  |  |  |  |  |  |  |  |  |  |  |  |  |  |  |  |  |  |  |  |  |  |  |  |  |  |  |  |  |  |  |  |  |  |  |  |  |  |  |  |  |  |  |  |  |  |  |  |  |  |  |  |  |  |  |  |  |  |  |  |  |  |  |  |  |  |  |  |  |  |  |  |  |  |  |  |  |  |  |  |  |  |  |  |  |  |  |  |  |  |  |  |  |  |  |  |  |  |  |  |  |  |  |  |  |  |  |  |  |  |  |  |  |  |  |  |  |  |  |  |  |  |  |  |  |  |  |  |  |  |  |  |  |  |  |  |  |  |  |  |  |  |  |  |  |  |  |  |  |  |  |  |  |  |  |  |  |  |  |  |  |  |  |  |  |  |  |  |  |  |  |  |  |  |  |  |  |  |  |  |  |  |  |  |  |  |  |  |  |  |  |  |  |  |  |  |  |  |  |  |  |  |  |  |  |  |  |  |  |  |  |  |  |  |  |  |  |  |  |  |  |  |  |  |  |  |  |  |  |  |  |  |  |  |  |  |  |  |  |  |  |  |  |  |  |  |  |  |  |  |  |  |  |  |  |  |  |  |  |  |  |  |  |  |  |  |  |  |  |  |  |  |  |  |  |  |  |  |  |  |  |  |  |  |  |  |  |  |  |  |  |  |  |  |  |  |  |  |  |  |  |  |  |  |  |  |  |  |  |  |  |  |  |  |  |  |  |  |  |  |  |  |  |  |  |  |  |  |  |  |  |  |  |  |  |  |  |  |  |  |  |  |  |  |  |  |  |  |  |  |  |  |  |  |  |  |  |  |  |  |  |  |  |  |  |  |  |  |  |  |  |  |  |  |  |  |  |  |  |  |  |  |  |  |  |  |  |  |  |  |  |  |  |  |  |  |  |  |  |  |  |  |  |  |  |  |  |  |  |  |  |  |  |  |  |  |  |  |  |  |  |  |  |  |  |  |  |  |  |  |  |  |  |  |  |  |  |  |  |  |  |  |  |  |  |  |  |  |  |  |  |  |  |  |  |  |  |  |  |  |  |  |  |  |  |  |  |  |  |  |  |  |  |  |  |  |  |  |  |  |  |  |  |  |  |  |  |  |  |  |  |  |  |  |  |  |  |  |  |  |  |  |  |  |  |  |  |  |  |  |  |  |  |  |  |  |  |  |  |  |  |  |  |  |  |  |  |  |  |  |  |  |  |  |  |  |  |  |  |  |  |  |  |  |  |  |  |  |  |  |  |  |  |  |  |  |  |  |  |  |  |  |  |  |  |  |  |  |  |  |  |  |  |  |  |  |  |  |  |  |  |  |  |  |  |  |  |  |  |  |  |  |  |  |  |  |  |  |  |  |  |  |  |  |  |  |  |  |  |  |  |  |  |  |  |  |  |  |  |  |  |  |  |  |  |  |  |  |  |  |  |  |  |  |  |  |  |  |  |  |  |  |  |  |  |  |  |  |  |  |  |  |  |  |  |  |  |  |  |  |  |  |  |  |  |  |  |  |  |  |  |  |  |  |  |  |  |  |  |  |  |  |  |  |  |  |  |  |  |  |  |  |  |  |  |  |  |  |  |  |  |  |  |  |  |  |  |  |  |  |  |  |  |  |  |  |  |  |  |  |  |  |  |  |  |  |  |  |  |  |  |  |  |  |  |  |  |  |  |  |  |  |  |  |  |  |  |  |  |  |  |  |  |  |  |  |  |  |  |  |  |  |  |  |  |  |  |  |  |  |  |  |  |  |  |  |  |  |  |  |  |  |  |  |  |  |  |  |  |  |  |  |  |  |  |  |  |  |  |  |  |  |  |  |  |  |  |  |  |  |  |  |  |  |  |  |  |  |  |  |  |  |  |  |  |  |  |  |  |  |  |  |  |  |  |  |  |  |  |  |  |  |  |  |  |  |  |  |  |  |  |  |  |  |  |  |  |  |  |  |  |  |  |  |  |  |  |  |  |  |  |  |  |  |  |  |  |  |  |  |  |  |  |  |  |  |  |  |  |  |  |  |  |  |  |
|      |           |       |                           | T0                    | T1 | T2 | T0 | T1 | T2 | T0 | T1 | T2 | T0      | T1 | T2 | T0          | T1 | T2 | T0       | T1 | T2 | T0    | T1 | T2 | T0                 | T1 | T2 | T0             | T1 | T2 |    |    |     |    |     |  |  |  |  |  |  |  |  |  |  |  |  |  |  |  |  |  |  |  |  |  |  |  |  |  |  |  |  |  |  |  |  |  |  |  |  |  |  |  |  |  |  |  |  |  |  |  |  |  |  |  |  |  |  |  |  |  |  |  |  |  |  |  |  |  |  |  |  |  |  |  |  |  |  |  |  |  |  |  |  |  |  |  |  |  |  |  |  |  |  |  |  |  |  |  |  |  |  |  |  |  |  |  |  |  |  |  |  |  |  |  |  |  |  |  |  |  |  |  |  |  |  |  |  |  |  |  |  |  |  |  |  |  |  |  |  |  |  |  |  |  |  |  |  |  |  |  |  |  |  |  |  |  |  |  |  |  |  |  |  |  |  |  |  |  |  |  |  |  |  |  |  |  |  |  |  |  |  |  |  |  |  |  |  |  |  |  |  |  |  |  |  |  |  |  |  |  |  |  |  |  |  |  |  |  |  |  |  |  |  |  |  |  |  |  |  |  |  |  |  |  |  |  |  |  |  |  |  |  |  |  |  |  |  |  |  |  |  |  |  |  |  |  |  |  |  |  |  |  |  |  |  |  |  |  |  |  |  |  |  |  |  |  |  |  |  |  |  |  |  |  |  |  |  |  |  |  |  |  |  |  |  |  |  |  |  |  |  |  |  |  |  |  |  |  |  |  |  |  |  |  |  |  |  |  |  |  |  |  |  |  |  |  |  |  |  |  |  |  |  |  |  |  |  |  |  |  |  |  |  |  |  |  |  |  |  |  |  |  |  |  |  |  |  |  |  |  |  |  |  |  |  |  |  |  |  |  |  |  |  |  |  |  |  |  |  |  |  |  |  |  |  |  |  |  |  |  |  |  |  |  |  |  |  |  |  |  |  |  |  |  |  |  |  |  |  |  |  |  |  |  |  |  |  |  |  |  |  |  |  |  |  |  |  |  |  |  |  |  |  |  |  |  |  |  |  |  |  |  |  |  |  |  |  |  |  |  |  |  |  |  |  |  |  |  |  |  |  |  |  |  |  |  |  |  |  |  |  |  |  |  |  |  |  |  |  |  |  |  |  |  |  |  |  |  |  |  |  |  |  |  |  |  |  |  |  |  |  |  |  |  |  |  |  |  |  |  |  |  |  |  |  |  |  |  |  |  |  |  |  |  |  |  |  |  |  |  |  |  |  |  |  |  |  |  |  |  |  |  |  |  |  |  |  |  |  |  |  |  |  |  |  |  |  |  |  |  |  |  |  |  |  |  |  |  |  |  |  |  |  |  |  |  |  |  |  |  |  |  |  |  |  |  |  |  |  |  |  |  |  |  |  |  |  |  |  |  |  |  |  |  |  |  |  |  |  |  |  |  |  |  |  |  |  |  |  |  |  |  |  |  |  |  |  |  |  |  |  |  |  |  |  |  |  |  |  |  |  |  |  |  |  |  |  |  |  |  |  |  |  |  |  |  |  |  |  |  |  |  |  |  |  |  |  |  |  |  |  |  |  |  |  |  |  |  |  |  |  |  |  |  |  |  |  |  |  |  |  |  |  |  |  |  |  |  |  |  |  |  |  |  |  |  |  |  |  |  |  |  |  |  |  |  |  |  |  |  |  |  |  |  |  |  |  |  |  |  |  |  |  |  |  |  |  |  |  |  |  |  |  |  |  |  |  |  |  |  |  |  |  |  |  |  |  |  |  |  |  |  |  |  |  |  |  |  |  |  |  |  |  |  |  |  |  |  |  |  |  |  |  |  |  |  |  |  |  |  |  |  |  |  |  |  |  |  |  |  |  |  |  |  |  |  |  |  |  |  |  |  |  |  |  |  |  |  |  |  |  |  |  |  |  |  |  |  |  |  |  |  |  |  |  |  |  |  |  |  |  |  |  |  |  |  |  |  |  |  |  |  |  |  |  |  |  |  |  |  |  |  |  |  |  |  |  |  |  |  |  |  |  |  |  |  |  |  |  |  |  |  |  |  |  |  |  |  |  |  |  |  |  |  |  |  |  |  |  |  |  |  |  |  |  |  |  |  |  |  |  |  |  |  |  |  |  |  |  |  |  |  |  |  |  |  |  |  |  |  |  |  |  |  |  |  |  |  |  |  |  |  |  |  |  |  |  |  |  |  |  |  |  |  |  |  |  |  |  |  |  |  |  |  |  |  |  |  |  |  |  |  |  |  |  |  |  |  |  |  |  |  |  |  |  |  |  |  |  |  |  |  |  |  |  |  |  |  |  |  |  |  |  |  |  |  |  |  |  |  |  |  |  |  |  |  |  |  |  |  |  |  |  |  |  |  |  |  |  |  |  |  |  |  |  |  |  |  |  |  |  |  |  |  |  |  |  |  |  |  |  |  |  |  |  |  |  |  |  |  |  |  |  |  |  |  |  |  |  |  |  |  |  |  |  |  |  |  |  |  |  |  |  |  |  |  |  |  |  |  |  |  |  |  |  |  |  |  |  |  |  |  |  |  |  |  |  |  |  |  |  |  |  |  |  |  |  |  |  |  |  |  |  |  |  |  |  |  |  |  |  |  |  |  |  |  |  |  |  |  |  |  |  |  |  |  |  |  |  |  |  |  |  |  |  |  |  |  |  |  |  |  |  |  |  |  |  |  |  |  |  |  |  |  |  |  |  |  |  |  |  |  |  |  |  |  |  |  |  |  |  |  |  |  |  |  |  |  |  |  |  |  |  |  |  |  |  |  |  |  |  |  |  |  |  |  |  |  |  |  |  |  |  |  |  |  |  |  |  |  |  |  |  |  |  |  |  |  |  |  |  |
|      |           |       |                           |                       |    |    |    |    |    |    |    |    |         |    |    |             |    |    |          |    |    |       |    |    |                    |    |    |                |    |    |    |    |     |    |     |  |  |  |  |  |  |  |  |  |  |  |  |  |  |  |  |  |  |  |  |  |  |  |  |  |  |  |  |  |  |  |  |  |  |  |  |  |  |  |  |  |  |  |  |  |  |  |  |  |  |  |  |  |  |  |  |  |  |  |  |  |  |  |  |  |  |  |  |  |  |  |  |  |  |  |  |  |  |  |  |  |  |  |  |  |  |  |  |  |  |  |  |  |  |  |  |  |  |  |  |  |  |  |  |  |  |  |  |  |  |  |  |  |  |  |  |  |  |  |  |  |  |  |  |  |  |  |  |  |  |  |  |  |  |  |  |  |  |  |  |  |  |  |  |  |  |  |  |  |  |  |  |  |  |  |  |  |  |  |  |  |  |  |  |  |  |  |  |  |  |  |  |  |  |  |  |  |  |  |  |  |  |  |  |  |  |  |  |  |  |  |  |  |  |  |  |  |  |  |  |  |  |  |  |  |  |  |  |  |  |  |  |  |  |  |  |  |  |  |  |  |  |  |  |  |  |  |  |  |  |  |  |  |  |  |  |  |  |  |  |  |  |  |  |  |  |  |  |  |  |  |  |  |  |  |  |  |  |  |  |  |  |  |  |  |  |  |  |  |  |  |  |  |  |  |  |  |  |  |  |  |  |  |  |  |  |  |  |  |  |  |  |  |  |  |  |  |  |  |  |  |  |  |  |  |  |  |  |  |  |  |  |  |  |  |  |  |  |  |  |  |  |  |  |  |  |  |  |  |  |  |  |  |  |  |  |  |  |  |  |  |  |  |  |  |  |  |  |  |  |  |  |  |  |  |  |  |  |  |  |  |  |  |  |  |  |  |  |  |  |  |  |  |  |  |  |  |  |  |  |  |  |  |  |  |  |  |  |  |  |  |  |  |  |  |  |  |  |  |  |  |  |  |  |  |  |  |  |  |  |  |  |  |  |  |  |  |  |  |  |  |  |  |  |  |  |  |  |  |  |  |  |  |  |  |  |  |  |  |  |  |  |  |  |  |  |  |  |  |  |  |  |  |  |  |  |  |  |  |  |  |  |  |  |  |  |  |  |  |  |  |  |  |  |  |  |  |  |  |  |  |  |  |  |  |  |  |  |  |  |  |  |  |  |  |  |  |  |  |  |  |  |  |  |  |  |  |  |  |  |  |  |  |  |  |  |  |  |  |  |  |  |  |  |  |  |  |  |  |  |  |  |  |  |  |  |  |  |  |  |  |  |  |  |  |  |  |  |  |  |  |  |  |  |  |  |  |  |  |  |  |  |  |  |  |  |  |  |  |  |  |  |  |  |  |  |  |  |  |  |  |  |  |  |  |  |  |  |  |  |  |  |  |  |  |  |  |  |  |  |  |  |  |  |  |  |  |  |  |  |  |  |  |  |  |  |  |  |  |  |  |  |  |  |  |  |  |  |  |  |  |  |  |  |  |  |  |  |  |  |  |  |  |  |  |  |  |  |  |  |  |  |  |  |  |  |  |  |  |  |  |  |  |  |  |  |  |  |  |  |  |  |  |  |  |  |  |  |  |  |  |  |  |  |  |  |  |  |  |  |  |  |  |  |  |  |  |  |  |  |  |  |  |  |  |  |  |  |  |  |  |  |  |  |  |  |  |  |  |  |  |  |  |  |  |  |  |  |  |  |  |  |  |  |  |  |  |  |  |  |  |  |  |  |  |  |  |  |  |  |  |  |  |  |  |  |  |  |  |  |  |  |  |  |  |  |  |  |  |  |  |  |  |  |  |  |  |  |  |  |  |  |  |  |  |  |  |  |  |  |  |  |  |  |  |  |  |  |  |  |  |  |  |  |  |  |  |  |  |  |  |  |  |  |  |  |  |  |  |  |  |  |  |  |  |  |  |  |  |  |  |  |  |  |  |  |  |  |  |  |  |  |  |  |  |  |  |  |  |  |  |  |  |  |  |  |  |  |  |  |  |  |  |  |  |  |  |  |  |  |  |  |  |  |  |  |  |  |  |  |  |  |  |  |  |  |  |  |  |  |  |  |  |  |  |  |  |  |  |  |  |  |  |  |  |  |  |  |  |  |  |  |  |  |  |  |  |  |  |  |  |  |  |  |  |  |  |  |  |  |  |  |  |  |  |  |  |  |  |  |  |  |  |  |  |  |  |  |  |  |  |  |  |  |  |  |  |  |  |  |  |  |  |  |  |  |  |  |  |  |  |  |  |  |  |  |  |  |  |  |  |  |  |  |  |  |  |  |  |  |  |  |  |  |  |  |  |  |  |  |  |  |  |  |  |  |  |  |  |  |  |  |  |  |  |  |  |  |  |  |  |  |  |  |  |  |  |  |  |  |  |  |  |  |  |  |  |  |  |  |  |  |  |  |  |  |  |  |  |  |  |  |  |  |  |  |  |  |  |  |  |  |  |  |  |  |  |  |  |  |  |  |  |  |  |  |  |  |  |  |  |  |  |  |  |  |  |  |  |  |  |  |  |  |  |  |  |  |  |  |  |  |  |  |  |  |  |  |  |  |  |  |  |  |  |  |  |  |  |  |  |  |  |  |  |  |  |  |  |  |  |  |  |  |  |  |  |  |  |  |  |  |  |  |  |  |  |  |  |  |  |  |  |  |  |  |  |  |  |  |  |  |  |  |  |  |  |  |  |  |  |  |  |  |  |  |  |  |  |  |  |  |  |  |  |  |  |  |  |  |  |  |  |  |  |  |  |  |  |  |  |  |  |  |  |  |  |  |  |  |  |  |  |  |  |  |  |  |  |  |  |  |  |  |  |  |  |  |

Sr: Senior; Jr: Junior; K: Ketoprofen; M: Meloxicam; F: Flunixin; T: time of pain assessment; ΔT1 = T1 – T0; ΔT2 = T2 – T0

Table S2: Individual data Study 2 - Analgesic effect of NSAIDs according to the pain score

| Table S2: Individual data Study 2 - Analgesic effect of NSAIDs according to the pain score |           |       |                           |                       |    |    |    |                                         |    |    |    |                               |         |    |    |             |    |    |          |    |    |       |    |    |                    |    |    |                |    |    |    |    |     |    |     |    |   |  |
|--------------------------------------------------------------------------------------------|-----------|-------|---------------------------|-----------------------|----|----|----|-----------------------------------------|----|----|----|-------------------------------|---------|----|----|-------------|----|----|----------|----|----|-------|----|----|--------------------|----|----|----------------|----|----|----|----|-----|----|-----|----|---|--|
| Case                                                                                       | Evaluator | NSAID | Time drug - score (hours) | Pain score assessment |    |    |    |                                         |    |    |    |                               |         |    |    |             |    |    |          |    |    |       |    |    |                    |    |    | Pain score /31 |    |    |    |    |     |    |     |    |   |  |
|                                                                                            |           |       |                           | Subjective assessment |    |    | HR |                                         |    | RR |    |                               | Posture |    |    | Interaction |    |    | Appetite |    |    | Colic |    |    | Muscle stimulation |    |    | Wound          |    |    | T0 | T1 | ΔT1 | T2 | ΔT2 |    |   |  |
|                                                                                            |           |       |                           | T0                    | T1 | T2 | T0 | T1                                      | T2 | T0 | T1 | T2                            | T0      | T1 | T2 | T0          | T1 | T2 | T0       | T1 | T2 | T0    | T1 | T2 | T0                 | T1 | T2 | T0             | T1 | T2 |    |    |     |    |     |    |   |  |
|                                                                                            |           |       |                           |                       |    |    |    |                                         |    |    |    |                               |         |    |    |             |    |    |          |    |    |       |    |    |                    |    |    |                |    |    |    |    |     |    |     |    |   |  |
|                                                                                            |           |       |                           |                       | /4 | /4 | /4 | <40 = 0 ; 40-49 = 1 ; 50-89=2 ; >60 = 3 |    |    |    | <20 = 0 ; 20-30 = 2 ; >30 = 4 |         |    |    | /3          | /3 | /3 | /3       | /3 | /3 | /4    | /4 | /4 | /6                 | /6 | /6 | /1             | /1 | /1 | /3 | /3 | /3  |    |     |    |   |  |
| 1                                                                                          | Sr 1      | K     | 13                        | 1,5                   | 0  | 2  | 0  | 0                                       | 0  | 0  | 2  | 0                             | 2       | 0  | 0  | 0           | 0  | 0  | 0        | 2  | 0  | 0     | 0  | 0  | 0                  | 0  | 1  | 1              | 0  | 0  | 2  | 2  | 3   | 7  | 4   | 4  | 1 |  |
| 2                                                                                          | Sr 1      | K     | 9                         | 3                     | 0  | 1  | 2  | 0                                       | 1  | 1  | 0  | 0                             | 0       | 0  | 1  | 0           | 0  | 0  | 0        | 0  | 0  | 0     | 0  | 0  | 0                  | 1  | 0  | 0              | 0  | 0  | 2  | 3  | 0   | 5  | 5   | 7  | 7 |  |
| 3                                                                                          | Sr 1      | M     | 9                         | 3                     | 0  | 1  | 0  | 1                                       | 1  | 0  | 0  | 0                             | 0       | 0  | 1  | 0           | 0  | 0  | 0        | 0  | 0  | 0     | 0  | 0  | 0                  | 0  | 1  | 0              | 0  | 1  | 0  | 1  | 5   | 4  | 0   | -1 |   |  |
| 4                                                                                          | Sr 1      | K     | 12                        | 2                     | 0  | 1  | 0  | 0                                       | 0  | 0  | 0  | 0                             | 0       | 0  | 0  | 0           | 0  | 0  | 0        | 0  | 0  | 0     | 0  | 0  | 0                  | 0  | 0  | 0              | 0  | 2  | 2  | 0  | 3   | 3  | 2   | 2  |   |  |
| 5                                                                                          | Sr 1      | M     | 12                        | 3                     | 0  | 1  | 0  | 0                                       | 0  | 0  | 0  | 0                             | 2       | 0  | 0  | 0           | 0  | 0  | 0        | 0  | 0  | 0     | 0  | 0  | 0                  | 0  | 0  | 0              | 0  | 1  | 1  | 0  | 2   | 2  | 3   | 3  |   |  |
| 6                                                                                          | Sr 1      | K     | 9                         | 3                     | 0  | 1  | 1  | 2                                       | 1  | 0  | 0  | 0                             | 0       | 0  | 0  | 0           | 1  | 0  | 0        | 1  | 0  | 0     | 0  | 0  | 0                  | 0  | 0  | 0              | 0  | 1  | 1  | 2  | 5   | 3  | 2   | 0  |   |  |
| 7                                                                                          | Sr 1      | M     | 11                        | 9                     | 0  | 2  | 1  | 0                                       | 1  | 1  | 0  | 2                             | 0       |    | 0  | 0           | 0  | 0  | 0        | 1  | 0  | 0     | 0  | 0  | 0                  | 0  | 0  | 0              | 0  | 2  | 1  | 0  | 8   | 8  | 3   | 3  |   |  |
| 8                                                                                          | Sr 1      | F     | 11                        | 1,5                   | 0  | 1  | 0  | 0                                       | 0  | 0  | 0  | 0                             | 0       | 0  | 0  | 0           | 0  | 0  | 0        | 0  | 0  | 0     | 0  | 0  | 0                  | 0  | 0  | 0              | 0  | 2  | 1  | 0  | 3   | 3  | 1   | 1  |   |  |
| 9                                                                                          | Sr 1      | F     | 11                        | 1                     | 0  | 2  | 1  | 0                                       | 1  | 0  | 0  | 0                             | 0       | 0  | 1  | 0           | 0  | 0  | 0        | 0  | 0  | 0     | 0  | 0  | 0                  | 0  | 1  | 0              | 0  | 2  | 1  | 0  | 7   | 7  | 2   | 2  |   |  |
| 10                                                                                         | Sr 2      | F     | 9                         | 6,5                   | 0  | 0  | 0  | 0                                       | 0  | 0  | 0  | 0                             | 0       | 0  | 0  | 0           | 0  | 0  | 0        | 0  | 0  | 0     | 0  | 0  | 0                  | 0  | 0  | 0              | 1  | 0  | 0  | 0  | 0   | 0  | 1   | 1  |   |  |
| 11                                                                                         | Sr 1      | M     | 10                        | 1                     | 0  | 1  | 0  | 1                                       | 1  | 1  | 2  | 0                             | 2       | 0  | 0  | 0           | 0  | 0  | 0        | 0  | 0  | 0     | 0  | 0  | 0                  | 0  | 0  | 0              | 0  | 1  | 1  | 3  | 3   | 0  | 4   | 1  |   |  |
| 12                                                                                         | Sr 2      | M     | 13                        | 1                     | 0  | 0  | 0  | 0                                       | 0  | 0  | 0  | 0                             | 2       | 1  | 0  | 0           | 0  | 0  | 0        | 0  | 0  | 0     | 0  | 0  | 0                  | 1  | 0  | 0              | 0  | 1  | 1  | 1  | 1   | 0  | 3   | 2  |   |  |
| 13                                                                                         | Sr 1      | M     | 10                        | 1,5                   | 0  | 1  | 1  | 0                                       | 0  | 0  | 0  | 0                             | 0       | 0  | 0  | 0           | 0  | 0  | 0        | 0  | 0  | 0     | 0  | 0  | 0                  | 0  | 0  | 0              | 0  | 2  | 1  | 0  | 3   | 3  | 2   | 2  |   |  |
| 14                                                                                         | Sr 1      | F     | 10                        | 2                     | 0  | 2  | 2  | 1                                       | 2  | 2  | 2  | 4                             | 4       | 0  | 0  | 0           | 0  | 0  | 0        | 0  | 0  | 0     | 0  | 0  | 0                  | 0  | 0  | 0              | 1  | 1  | 3  | 9  | 6   | 9  | 6   |    |   |  |
| 15                                                                                         | Sr 1      | F     | 11                        | 3,5                   | 0  | 2  | 1  | 1                                       | 1  | 1  | 0  | 0                             | 0       | 0  | 1  | 0           | 0  | 1  | 0        | 0  | 0  | 0     | 0  | 0  | 0                  | 0  | 0  | 0              | 0  | 1  | 1  | 1  | 6   | 5  | 3   | 2  |   |  |
| 16                                                                                         | Sr 2      | K     | 11                        | 2                     | 0  | 1  | 0  | 0                                       | 0  | 0  | 0  | 0                             | 0       | 0  | 1  | 0           | 1  | 1  | 1        | 0  | 0  | 0     | 0  | 0  | 0                  | 1  | 1  | 0              | 0  | 0  | 1  | 4  | 3   | 2  | 1   |    |   |  |
| 17                                                                                         | Sr 2      | K     | 10                        | 2                     | 0  | 1  | 2  | 1                                       | 0  | 0  | 0  | 0                             | 0       | 0  | 0  | 0           | 1  | 0  | 1        | 0  | 1  | 0     | 0  | 0  | 0                  | 1  | 1  | 0              | 2  | 2  | 2  | 5  | 3   | 6  | 4   |    |   |  |
| 18                                                                                         | Sr 2      | F     | 11                        | 1                     | 0  | 1  | 1  | 1                                       | 0  | 0  | 0  | 2                             | 2       | 0  | 0  | 0           | 1  | 0  | 0        | 0  | 1  | 0     | 0  | 0  | 0                  | 1  | 1  | 0              | 0  | 0  | 3  | 5  | 2   | 3  | 0   |    |   |  |
| 19                                                                                         | Sr 2      | F     | 11                        | 7                     | 0  | 0  | 1  | 0                                       | 0  | 0  | 0  | 2                             | 0       | 0  | 0  | 0           | 0  | 0  | 0        | 1  | 0  | 0     | 0  | 0  | 1                  | 0  | 0  | 0              | 1  | 0  | 1  | 4  | 3   | 1  | 0   |    |   |  |
| 20                                                                                         | Sr 1      | M     | -                         | -                     | 0  | 1  | 0  | 0                                       | 1  | 1  | 0  | 2                             | 2       | 0  | 1  | 0           | 0  | 0  | 0        | 1  | 0  | 0     | 0  | 0  | 0                  | 0  | 0  | 0              | 2  | 1  | 1  | 7  | 6   | 4  | 3   |    |   |  |
| 21                                                                                         | Sr 2      | M     | 9,5                       | 1,5                   | 0  | 1  | 0  | 0                                       | 0  | 0  | 0  | 2                             | 0       | 0  | 0  | 0           | 0  | 0  | 0        | 0  | 0  | 0     | 0  | 0  | 0                  | 0  | 0  | 0              | 2  | 2  | 0  | 5  | 5   | 2  | 2   |    |   |  |
| 22                                                                                         | Sr 1      | F     | 10                        | 9,5                   | 0  | 1  | 0  | 0                                       | 2  | 0  | 2  | 0                             | 0       | 0  | 0  | 0           | 0  | 0  | 0        | 1  | 0  | 0     | 0  | 0  | 0                  | 1  | 0  | 0              | 2  | 2  | 2  | 7  | 5   | 2  | 0   |    |   |  |

|    |      |   |     |     |   |   |   |   |   |   |   |   |   |   |   |   |   |   |   |   |   |   |   |   |   |   |   |   |   |   |   |   |   |   |    |
|----|------|---|-----|-----|---|---|---|---|---|---|---|---|---|---|---|---|---|---|---|---|---|---|---|---|---|---|---|---|---|---|---|---|---|---|----|
| 23 | Sr 1 | F | 10  | 1   | 0 | 0 | 0 | 1 | 2 | 1 | 0 | 0 | 0 | 0 | 0 | 0 | 0 | 0 | 0 | 1 | 0 | 0 | 0 | 0 | 0 | 0 | 0 | 1 | 0 | 1 | 4 | 3 | 1 | 0 |    |
| 24 | Sr 1 | F | 12  | 2,5 | 0 | 1 | 1 | 0 | 0 | 1 | 0 | 0 | 0 | 0 | 0 | 0 | 1 | 0 | 1 | 0 | 0 | 0 | 0 | 0 | 0 | 0 | 0 | 1 | 2 | 1 | 3 | 2 | 4 | 3 |    |
| 25 | Sr 1 | K | 12  | -   | 0 | 1 | 3 | 1 | 1 | 1 | 2 | 2 | 0 | 0 | 0 | 0 | 1 | 1 | 1 | 1 | 2 | 0 | 0 | 0 | 0 | 1 | 1 | 0 | 0 | 1 | 4 | 7 | 3 | 9 | 5  |
| 26 | Sr 1 | K | 9,5 | 3,5 | 0 | 2 | 0 | 0 | 1 | 1 | 0 | 0 | 0 | 0 | 0 | 0 | 0 | 0 | 0 | 0 | 0 | 0 | 0 | 0 | 0 | 1 | 0 | 0 | 2 | 1 | 0 | 6 | 6 | 2 | 2  |
| 27 | Sr 1 | M | 9,5 | 3   | 0 | 1 | 0 | 1 | 1 | 1 | 2 | 2 | 2 | 0 | 0 | 0 | 0 | 0 | 0 | 1 | 0 | 0 | 0 | 0 | 0 | 0 | 0 | 0 | 2 | 2 | 3 | 7 | 4 | 5 | 2  |
| 28 | Sr 2 | F | 11  | 1   | 0 | 1 | 0 | 1 | 0 | 0 | 2 | 2 | 0 | 0 | 0 | 0 | 0 | 0 | 0 | 1 | 0 | 0 | 0 | 0 | 0 | 0 | 0 | 0 | 1 | 2 | 3 | 5 | 2 | 2 | -1 |
| 29 | Sr 2 | F | 11  | 1,5 | 0 | 3 | 2 | 1 | 0 | 0 | 2 | 0 | 0 | 0 | 2 | 1 | 1 | 1 | 1 | 0 | 1 | 1 | 0 | 0 | 0 | 0 | 0 | 0 | 1 | 1 | 4 | 8 | 4 | 6 | 2  |
| 30 | Sr 2 | M | 11  | 8,5 | 0 | 1 | 0 | 0 | 0 | 0 | 2 | 0 | 0 | 0 | 1 | 0 | 0 | 0 | 0 | 1 | 0 | 0 | 0 | 0 | 0 | 0 | 1 | 0 | 2 | 2 | 2 | 5 | 3 | 3 | 1  |

Sr 1: AL; Sr 2: LL; K: Ketoprofen; M: Meloxicam; F: Flunixin; T: time of pain assessment;  $\Delta T1 = T1 - T0$ ;  $\Delta T2 = T2 - T0$
